# Supplementary material for: Assimilation of snow water equivalent from AMSR2 and IMS satellite data utilizing the local ensemble transform Kalman filter
Source: Copernicus journal article supplement (doi:10.5194/gmd-2023-221), 2023-12-05
Supplement: Supplementary file [file gmd-2023-221-RC2-supplement.pdf]

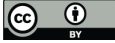

1                   **Assimilation of snow water equivalent from AMSR2 and IMS**  
2                   **satellite data utilizing the local ensemble transform Kalman filter**

3

4                   Joonlee lee<sup>1</sup>, Myong-In Lee<sup>1\*</sup>, Sunlae Tak<sup>1</sup>, Eunkyo Seo<sup>2</sup>, and Yong-Keun Lee<sup>3</sup>

5

6                   <sup>1</sup> *Department of Civil, Urban, Earth, and Environmental Engineering, Ulsan National*  
7                   *Institute of Science and Technology, Ulsan, Korea*

8                   <sup>2</sup> *Department of Environmental Atmospheric Sciences, Pukyong National University, Busan,*  
9                   *South Korea.*

10                  <sup>3</sup> *Earth System Science Interdisciplinary Center, University of Maryland, College Park,*  
11                  *U.S.A.*

12

13

14

15

16

17

18

19

---

20                  \*Corresponding author: Prof. Myong-In Lee, Department of Urban and Environmental  
21                  Engineering, Ulsan National Institute of Science and Technology, 50 UNIST-gil, Ulsan 44919,  
22                  Republic of Korea (milee@unist.ac.kr)

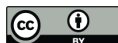

## 23 Abstract

24 The advanced snow data assimilation is developed in this study with satellite remote-  
25 sensing retrievals of snow water equivalent(SWE) and snow cover fraction(SCF) utilizing the  
26 local ensemble transform Kalman filter based on the Joint U.K. Land Environment  
27 Simulator(JULES) land model. The system assimilates SWE from the Advanced Microwave  
28 Scanning Radiometer 2(AMSR2) and SCF from the Interactive Multisensor Snow and Ice  
29 Mapping System(IMS) during April 2013-2020. The performance is evaluated by the  
30 validations with independent data assimilation products derived from in-situ observation.

31 The baseline model simulation from JULES without satellite data assimilation shows a  
32 superior performance in high-latitude regions with heavy snow accumulation, but relatively  
33 inferior in the transition regions with less snow and high spatial and temporal variation.  
34 Contrastingly, the AMSR2 satellite data exhibit a superior performance in the transition regions,  
35 but poor performance in the high latitudes, presumably due to the limitation in the penetrating  
36 depth of satellite retrieval. The data assimilation(DA) that combines AMSR2 and IMS satellite  
37 data with the JULES model backgrounds demonstrates the positive impacts by reducing  
38 uncertainty in both satellite-derived snow data in penetrating deep snow and the model  
39 simulations in the transition regions. While DA shows superior performance in most regions,  
40 it specifically improves the analysis in the mid-latitude transition regions where the model  
41 background errors from the ensemble runs are significantly larger than the observation errors,  
42 emphasizing the substantial influence of satellite information. The long-term analysis of snow  
43 manifests a pronounced variability in the continental interior at the interannual timescales,  
44 which implies large uncertainty in the snow initialization for the sub-seasonal to seasonal  
45 predictions of the climate models, potentially degrading prediction skills without satellite snow  
46 data assimilation.

47



## 48 1. Introduction

49 Snow plays a crucial role in regulating the water, energy, and carbon exchange between the  
50 land surface and atmosphere(e.g., Dutra et al., 2011; Thomas et al., 2016). A snowpack tends  
51 to increase surface albedo and soil moisture as the snow melts. It has an impact on the climate  
52 system with the water balance by the soil moisture change and the energy balance by albedo  
53 variations. In addition to local impacts, the continental snowpack over Eurasia can influence  
54 the large scale circulation during winter(e.g., Li and Wang, 2014) or in spring(e.g., Broxton et  
55 al., 2017). Especillaly, the Eurasian autumn snow can affect upward-propagating stationary  
56 Rossby-wave activity, leading to stratospheric warming and weakening of stratospheric polar  
57 vortex and jet stream, which in turn emerges as a negative Arctic oscillation(AO)-like pattern  
58 at the surface during winter due to downward propagation through the troposphere. Its impact  
59 is shown in both observation and model experiments(e.g., Allen and Zender 2011; Cohen et al.  
60 2007). Therefore, the snow initialization process in climate models is closely related to the  
61 improvement of prediction performance.

62 In the short and medium forecasts, snow is simply prescribed based on  
63 climatological values because the forecasts are significantly influenced by the accuracy of the  
64 initial atmospheric states in climate models. To extend the accurate prediction to subseasonal  
65 to seasonal(S2S) timescales, the atmospheric and the more slowly evolving initial conditions  
66 need to be carefully considered. Land initial states such as snow are crucial components in the  
67 S2S timescale predictions due to their climatic memory lasting 1-2 months(e.g., Chen et al.,  
68 2010). The realistic snow initial states can contribute to improving S2S prediction skills, as  
69 proven in several modeling studies(e.g., Orsolini et al., 2013; Li et al., 2019).

70 Snow states are generally provided from in-situ observations data, remote-sensing  
71 retrievals from satellites, or numerical models such as the land surface model(LSM) operated  
72 based on the observed atmospheric variables. In the case of the in-situ data, the primary source



73 of snow depth(SD) is ~~obtained from~~ surface synoptic observations(SYNOP). These  
74 observations are provided almost in real-time through the global telecommunication  
75 system(GTS). In addition to SYNOP, there are some regional snow measurement networks.  
76 For instance, the snowpack telemetry(SNOTEL) network collects data on SD over 900  
77 automated observation points located in the western United States, and the National Oceanic  
78 and Atmospheric Administration (NOAA) Cooperative Observer Program gathers SD data in  
79 North American region. Nevertheless, data collected from these national networks cannot be  
80 utilized in the almost real-time GTS. Directly measured in-situ data provide the most reliable  
81 snow information but have relatively coarse temporal and spatial resolutions over the limited  
82 area because of spatial heterogeneities of snow(Helmert et al., 2018). **Recently, in order to**  
83 **obtain high-resolution and high-quality snow water equivalent(SWE) analysis,** artificial  
84 intelligence(AI) such as long short-term memory(LSTM) has been utilized with the given  
85 meteorological conditions from SNOTEL observations as input data, but it is still insufficient  
86 to cover the entire globe(Meyal et al., 2020).

87 Satellite-derived observations using conical scanning microwave instruments may provide  
88 spatially consistent data coverage across the globe. Cho et al.(2017) showed the SWE retrieval  
89 results from two passive microwave sensors, the advanced microwave scanning radiometer  
90 2(AMSR2) and the special sensor microwave imager sounder(SSMIS). However, the  
91 algorithms for SWE retrieval exhibit a degree of sensitivity to a variety of parameters such as  
92 snow liquid water content and snow grain size distribution(De Rosnay et al., 2014). Hence,  
93 satellite-based SWE data still have limitations in accuracy, especially under deep snow  
94 conditions due to the **restrictions in** penetration depth(Gan et al., 2021). On the other hand,  
95 satellite retrieval can estimate snow cover accurately under clear sky conditions (Brubaker et  
96 al., 2009). The moderate resolution imaging spectroradiometer(MODIS) instrument observes  
97 daily snow cover, while a multi-satellite-based interactive multi-sensor snow and ice mapping



98 system(IMS) provided by the United States National Snow and Ice Data Center produces the  
99 snow cover by combining in-situ observations and satellite data from microwave, infrared, and  
100 visible sensors.

101 **Model simulations** can cover complete spatiotemporal resolution but involve potentially  
102 large uncertainties due to the deficiencies in the physical parameterizations and meteorological  
103 forcing data(Dirmeyer et al., 2006; Seo et al., 2020). To reduce the uncertainties from model  
104 simulations, previous studies have used satellite-based snow cover and in-situ observation such  
105 as SYNOP SD available on the GTS, in conjunction with the model simulation(e.g., Brasnett,  
106 1999; Dee et al., 2011; Meng et al., 2012; Pullen et al., 2011; De Rosnay et al., 2014). **For**  
107 **example, the snow analysis for the Canadian Meteorological Center(CMC) utilizes a 2-**  
108 **dimensional optimal interpolation(2D-OI) scheme with in-situ observations and the outputs**  
109 **from a simple snow model(Brown et al., 2003). The National Centers for Environmental**  
110 **Prediction (NCEP) climate forecast system reanalysis(CFSR) combines the IMS as satellite-**  
111 **based snow cover retrieval and the outputs from the global SD model of the Air Force Weather**  
112 **Agency(Meng et al., 2012). At the European Center for Medium Weather Forecast (ECMWF),**  
113 **the ECMWF reanalysis (ERA)-Interim and ERA5 for the snow analysis employ a Cressman**  
114 **interpolation and 2D-OI, respectively, with the IMS, in-situ observation, and the results from**  
115 **a land surface model(Dee et al. 2011; De Rosnay et al., 2014). The Japanese 55-year**  
116 **Reanalysis(JRA55) also utilizes the 2D-OI with in-situ observation, satellite-based snow cover**  
117 **from SSMIS, and the results from an LSM(Kobayashi et al., 2015).**

118 The most commonly employed approach to obtain reasonable estimates of land initial states  
119 for predictions is running atmospheric general circulation models(AGCMs; Pullen et al., 2011)  
120 or offline mode of LSMs with observed atmospheric conditions(Dirmeyer et al., 2006). Climate  
121 prediction systems in operational centers such as the Meteorological Office(Met Office) (~~Met~~  
122 ~~Office~~) in the United Kingdom and the Korean Meteorological Administration(KMA) conduct



123 the snow initialization by utilizing the results of the operational global unified model(UM) and  
124 the IMS snow cover(Pullen et al., 2011). The initialization at NCEP also performs a similar  
125 approach using input data combined from IMS snow cover and results from the global SD  
126 model(SNODEP; Meng et al., 2012). Furthermore, the snow initialization of ECMWF employs  
127 optimal interpolation with a combination of results from the LSM, IMS snow cover, and in-  
128 situ observation from SYNOP and national networks available on the GTS. However, in areas  
129 where ground observations are not available, the results of the snow model are relied upon,  
130 **which still exists significant uncertainty in snow accumulation** because of uncertainties in the  
131 atmospheric forcing and **imperfect model parameterizations**(Boone et al., 2004; Essery et al.,  
132 2009). It would be useful to to accurately initialize the snow amount including vertical depth,  
133 which is more important in estimating energy and water budgets, by using the satellite-derived  
134 snow amounts with **comparatively uniform spatial and temporal resolution**.

135 However, the SWE retrievals from satellites still have considerable uncertainties(De  
136 Lannoy et al., 2010; Dawson et al., 2018), which can arise from vegetation and terrain  
137 interference, sensor signal saturation, snowfall amount, and simplifications in the underlying  
138 assumptions of the retrieval algorithms(Liu et al., 2015). In particular, a region with heavy  
139 snow accumulation leads to a significant underestimation of SWE due to the limitations in  
140 penetration depth from satellites(Gan et al., 2021). For this reason, satellite-derived SWE is not  
141 employed in the land initialization process. Nevertheless, the SWE retrieval shows important  
142 advantages such as high performance in shallow snow areas with temporal and spatial  
143 homogeneity(Gan et al., 2021). In previous studies, various approaches have been attempted  
144 to improve SWE product performance, such as combining satellite-derived SWE with ground  
145 observations(Pulliainen et al., 2020), different satellite data sets(Gan et al., 2021), simple snow  
146 models(Dziubanski and Franz, 2016), or LSMs(Kwon et al., 2017). For instance, Kumar et  
147 al.(2019) show the improvement of the SD estimation over the contiguous United States by



148 assimilating satellite snow SD into the Noah LSM, indicating that these model-based products  
149 are generally superior to stand-alone satellite-based SWE retrievals. Thus, a globally advanced  
150 snow initialization such as data assimilation using satellite snow amount is ideal for providing  
151 realistic snow initial states related to S2S prediction skills.

152 Therefore, the purpose of this study is to develop an advanced snow assimilation system  
153 utilizing the Local Ensemble Transform Kalman Filter(LETKF) with satellite-derived  
154 observations of SWE, IMS snow cover, as well as the Joint U.K. Land Environment  
155 Simulator(JULES). In this context, our focus is on SWE rather than SD, because the former  
156 can be used directly for hydrological analysis and initial states of the model(Gan et al., 2021).  
157 From this novel assimilation system, we endeavor to achieve the following objectives. The  
158 primary aim is to assess the enhancement in SWE performance through the assimilation with  
159 satellite remote sensing data. The satellite data show high performance in the transition regions  
160 with climatologically shallow conditions, termed by Koster et al.(2004) as “hot spots” of  
161 atmosphere-land coupling. The second goal is to reveal the reason for skill improvement with  
162 the snow data assimilation, based on the Kalman gain analysis that measures the ratio of the  
163 model errors with respect to the observation errors. From these perspectives, it would be  
164 possible to know how much the satellite has affected the transition regions, and how the  
165 assimilation system deals with the regions of deep snow accumulation where the satellite has  
166 difficulty in accurate retrieval. The final goal is to evaluate the advantages of assimilating  
167 satellite retrievals in extreme high-temperature events, specifically over Eurasia in April 2020.  
168 In this regard, we expect that the data assimilation of satellite-derived snow information can be  
169 an alternative to produce optimal snow initial states for improving the S2S prediction skill in  
170 the climate models.

171

## 172 2. Data and model



173 **2.1. Satellite data**

174 The snow information including snow cover and SWE can be derived from satellite  
175 measurements offering global coverage and high temporal as well as spatial resolution. For  
176 data assimilation, this study uses SWE calculated from brightness temperature measurements  
177 obtained by the AMSR2 on board the Japanese Aerospace Exploration Agency (JAXA) global  
178 change observation mission-water(GCOM-W) satellite. This AMSR2 Unified Level-3(L3)  
179 dataset offers daily estimation of SWE at 25 km resolutions from July 2012 to the present.  
180 AMSR2 has a sensor designed to detect microwave radiation naturally emitted from the surface  
181 and atmosphere, employing six frequency bands ranging from 6.9 to 89 GHz. Through this  
182 conical scanning mechanism, AMSR2 can acquire day and night datasets with nearly constant  
183 spatial resolution over more than 99% of the global coverage every two days. Comprehensive  
184 explanations of AMSR2 characteristics are available in Imaoka et al.(2010). AMSR2 is  
185 selected for the assimilation because it produces **more skilled** results by assimilating data from  
186 modern sensors(e.g., AMSR2) compared to data from conventional sensors(e.g., AMSR-  
187 E)(Cho et al., 2017).

188

189 **2.2. Reference data for SWE and SCF**

190 The CMC daily estimated SWE is used for verification. The SWE data is processed using  
191 statistical interpolation between a background field derived from a simple snow model and in-  
192 situ daily SD(Brown and Brasnett, 2010). In detail, this dataset utilizes optimal interpolation  
193 methods to acquire spatial SD from the in-situ data, involving SYNOP, special aviation reports  
194 from the World Meteorological Organization(WMO), and meteorological aviation  
195 reports(METAR). In areas with scant in-situ data, a simple snow accumulation and melt model  
196 is employed to create an optimal interpolation that estimates snowmelt and snowfall worldwide,  
197 assuming the persistence of the snowpack mass between snowfall and melting





198 events(Brasnett, 1999). Although the average elevation of snow measurement stations used in  
199 CMC is biased toward low elevations(< 400m), leading to a **potential negative** bias at high  
200 elevations, the CMC dataset is often considered the premier snow analysis accessible in the  
201 Northern Hemisphere(Su et al. 2010) and has still been widely used to evaluate model  
202 outputs(e.g., Reichle et al., 2011; Reichle et al., 2017; Toure et al, 2018). Therefore, the SWE  
203 of CMC produced without the satellite-derived data is selected for verification as an  
204 independent dataset for evaluating the assimilated analysis with remote sensing snow retrievals.  
205 Since only daily SD analysis is provided in CMC, it is converted to daily SWE based on the  
206 snow bulk density methods(e.g., Sturm et al., 2010). It is available from 12 March 1998 to the  
207 present and offers comprehensive coverage of the entire Northern Hemisphere with a  
208 horizontal resolution of 24 km. The SWE of CMC at its native horizontal resolution is  
209 interpolated onto the LSM grid through local area averaging.

210 The widely used multisensor-derived snow cover is IMS(e.g., Ramsay 1998; Helfrich et  
211 al., 2007) produced by NOAA the National Environmental Satellite Data and Information  
212 Service(NESDIS) for the Northern Hemisphere from February 2004 to the present at 4 km  
213 resolutions. This dataset is generated using various data products, including multi-satellite  
214 images and in-situ observations(U.S. National Ice Center, 2008). Since IMS provides binary(0:  
215 no snow or 1: snow covered) snow cover information, we transform the IMS snow cover at 4  
216 km grids to the snow cover fraction(SCF) within a 50-km LSM grid by counting the snow pixel  
217 number with a value of 1. A 50-km LSM grid is declared as snow-covered when more than 50%  
218 of the 4km pixels within the grid are covered with snow. **In this study, the IMS-based SCF is**  
219 **employed to mask the SWE, considering the higher reliability of IMS data (e.g., Brown et al.,**  
220 **2014).**

221

### 222 **2.3. JULES LSM**



223 This study utilizes the JULES LSM from the Met Office(Best et al., 2011), a component  
224 land model of the global seasonal forecasting system version 6(GloSea6) global, fully-coupled  
225 atmosphere, ocean, land, and sea-ice model. The surface types(or snow tiles) in the JULES  
226 LSM consist of four non-vegetated types: urban, land-ice, inland water, and bare soil, as well  
227 as five vegetation functional types: C3 temperate grass, needleleaf trees, shrubs, C4 tropical  
228 grass, and broadleaf trees. For each surface tile, a separate energy balance is computed, and the  
229 average energy balance in the grid cells is determined by applying weights to the values of each  
230 surface tile. Two schemes are used within JULES to represent surface snow. The simple  
231 method involves a zero-layer approach, which modifies the top soil level without using explicit  
232 model layers to represent snow processes. **The other is the multi-layer approach which is more**  
233 **comprehensive.** In the case of vegetated surfaces, snow can be separated into ground snow and  
234 canopy snow or stored in a single effective reservoir. As both the zero-layer and multi-layer  
235 snow models provide similar results under various conditions(e.g., Best et al., 2011), this study  
236 used the zero-layer snow model with constant thermal conductivity and density for snow.  
237 Although the heat capacity of snow is ignored, the bulk thermal conductivity in the surface  
238 layer is reduced as the thermal conductivity of snow differs from that of the soil and the layer  
239 thickness increases. As long as snow persists on the ground, the skin temperature cannot exceed  
240 0°C, yet the heat flux utilized for melting the snow is **diagnosed through the residual surface**  
241 **energy balance.** The melted water is immediately drained from the snow, divided into runoff  
242 and soil infiltration, and liquid water is not stored or frozen in the snow. A detailed description  
243 of the energy and water cycling in the JULES LSM can be referenced in Best et al.(2011).

244 The prognostic variables(e.g., SWE) in the LSM are determined by meteorological forcing  
245 variables such as 2-m air temperature, humidity, 10-m wind speed, precipitation, surface  
246 pressure, and radiative fluxes. The 3-hourly, JRA55 reanalysis at 0.56° spatial resolution is  
247 employed for the meteorological forcing variables, which is linearly interpolated to a 50 km



248 resolution of the LSM. The model background error needed for data assimilation is estimated  
249 by JULES ensemble runs with perturbed initial and boundary conditions. Following the  
250 previous studies(Reichle et al., 2008; Seo et al., 2021), meteorological forcing variables are  
251 perturbed due to randomness, especially precipitation, downward shortwave, and downward  
252 longwave. Perturbations are applied using additive adjustments assuming a normal distribution  
253 for longwave radiation and multiplicative adjustments following a log-normal distribution for  
254 shortwave radiation and precipitation. Here, the ensemble means of additional and  
255 multiplicative perturbations are zero and one, respectively. The relationship between disturbed  
256 precipitation and radiative flux ensures the physical consistency among atmospheric forcing  
257 variables(Reichle et al., 2008). For instance, a negative anomaly in precipitation and downward  
258 longwave-radiation is statistically linked to a positive anomaly of downward shortwave-  
259 radiation. Detailed explanations regarding the perturbation of atmospheric forcings can be  
260 found in Reichle et al.(2008).

261

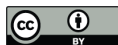

## 262 **3. Methodology**

### 263 **3.1. Bias correction**

264 **The discrepancies in SWE between remote sensing and LSMs are often caused by uncertainties**  
265 **in the model physics and meteorological forcing data.** These differences can lead to significant  
266 biases in the variance and mean of SWE between model simulations and satellite remote-  
267 sensing retrievals, and such biases can result in poor performance. In previous studies(e.g.,  
268 Reichle and Koster, 2004; Seo et al., 2021), a scaling method of the nonlinear cumulative  
269 distribution function(CDF) matching is used to account for the systematic bias of soil moisture  
270 in the model backgrounds. **However, in this study, it is difficult to apply it as the CDF**  
271 **distribution of SWE could not be clearly simulated due to the insufficient sample size.** To  
272 address this issue, we attempted to apply a simple and effective standard normal deviation  
273 scaling to **satellite-derived SWE.** Based on the climatology and standard deviation for the  
274 model and remote sensing retrievals, the scaled SWE( $O_{new}$ ) from the satellite can be derived  
275 from the following relation:

276

$$277 \quad O_{new} = \left( \frac{O - \bar{O}}{\sigma_o} \times \sigma_m \right) + \bar{M} \quad (1)$$

278

279 , where  $\bar{O}(\sigma_o)$  and  $\bar{M}(\sigma_m)$  indicate climatology(standard deviation) of remote sensing  
280 retrievals and the model, respectively. This approach has been widely utilized in observation-  
281 based land initialization and has proven to be effective(e.g., Koster et al., 2011; Jeong et al.,  
282 2013).

283

### 284 **3.2. Snow assimilation method**

285 The snow assimilation is conducted based on the LETKF(e.g., Hunt et al., 2007), which is

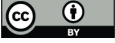

286 utilized to combine satellite remote-sensing retrievals with the LSM model outputs(a.k.a.  
287 backgrounds) to produce a snow analysis. LETKF is a powerful data assimilation method and  
288 has several advantages over other methods. First, LETKF can efficiently handle large datasets  
289 and high-dimensional state variables by localizing the covariance matrix. This offers efficiency  
290 in parallel computing, making it suitable for real-time forecasting and high-resolution data  
291 assimilation. Secondly, the method utilizes model simulation ensembles to capture the  
292 uncertainty in the initial states and model errors, which allows for a better representation of the  
293 true probability distribution of the state variables that vary in time and space. Third, LETKF  
294 applies an adaptive inflation scheme, which adjusts the ensemble spread to account for the  
295 observational and model errors, ensuring that the uncertainty estimates are realistic and not  
296 underestimated nor overestimated. In LETKF, the analysis states( $X^a$ ) are obtained by

$$297 \quad X^a = \bar{X}^a + \delta X^a \quad (2)$$

298 , where  $\bar{X}^a$  and  $\delta X^a$  are the matrices of analysis ensemble means and perturbations,  
299 respectively. They are defined by

$$300 \quad \bar{X}^a = \bar{X}^f + \delta \tilde{x}^a \quad (3)$$

$$301 \quad \delta X^a = \delta X^f [(K - 1)\tilde{P}^a]^{1/2}. \quad (4)$$

302 Here, the analysis ensemble means( $\bar{X}^a$ ) is determined by gathering the analysis increment( $\delta \tilde{x}^a$ )  
303 to the model ensemble mean( $\bar{X}^f$ ) produced by the JULES land surface model. The analysis  
304 ensemble perturbation( $\delta X^a$ ) is computed considering the model perturbation( $\delta X^f$ ), the  
305 number of model ensembles( $K$ ), and the analysis error covariance( $\tilde{P}^a$ ) in the ensemble space.  
306 The analysis increment( $\delta \tilde{x}^a$ ) is acquired by considering the difference between the SWE of  
307 AMSR2 used as observation and the model ensembles produced by the JULES LSM and  
308 determined by

$$309 \quad \delta \tilde{x}^a = \delta X^f \tilde{P}^a \delta Y^T R^{-1} (y^o - \overline{H(X^f)}), \text{ and} \quad (5)$$

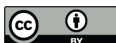

310 
$$\tilde{P}^a = \left[ \frac{(K-1)I}{\rho} + \delta Y^T R^{-1} \delta Y \right]^{-1}. \quad (6)$$

311 It consists of the model ensemble perturbation( $\delta X^f$ ), the analysis error covariance( $\tilde{P}^a$ ),  
312 observation error covariance( $R$ ), model ensemble perturbation in the observation grid( $\delta Y$ ), and  
313 observation innovation ( $y^o - \overline{H(X^f)}$ ) derived from the difference between the model  
314 ensemble in the observation grid( $\overline{H(X^f)}$ ) and the observation( $y^o$ ). Here,  $H$  represents the  
315 observation operator, projecting the modeled snow background onto the satellite observation  
316 locations using bilinear interpolation.  $\rho$  denotes the covariance inflation factor for the  $\tilde{P}^a$ ,  
317 aiding in preventing underestimation of the covariance. This study applies multiplication-based  
318 20% inflation( $\rho$ ) for the ensemble spread derived from 24 member ensembles. Therefore, the  
319 final analysis state( $X^a$ ) is written as

320 
$$X^a = \bar{X}^f + \delta X^f \left[ \tilde{P}^a \delta Y^T R^{-1} (y^o - \overline{H(X^f)}) + [(K-1)\tilde{P}^a]^{\frac{1}{2}} \right]. \quad (7)$$

321 This approach involves the weight function( $w(d_j)$ ) for the covariance localization within  
322 the local patch centered at the analysis grid(e.g., Houtekamer and Mitchell, 2001; Hamill et al.,  
323 2001). This function assigns larger errors to observations located farther away from the center  
324 of the local patch, as proposed by Miyoshi and Yamane(2007), depending on the Gaussian  
325 function as

326 
$$w(d_j) = e^{\frac{-d_j^2}{2\sigma^2}} \quad (8)$$

327 where  $\sigma$  denotes a parameter of the localization length scale and  $d_j$  indicates the distance of  
328  $j$ -th observed value from the center of each local patch. In this study, the horizontal local patch  
329 size and the localization length scale parameters are defined as 150 km and 30 km(Table 1),  
330 respectively. Detailed information about the LETKF algorithm and its implementation can be  
331 referenced in Hunt et al.(2007) and Shlyayeva et al.(2013).

332



### 333 3.3. Snow data assimilation design

334 This study conducts the advanced snow data assimilation experiment at a daily cycle based  
335 on LETKF with the satellite data and the JULES LSM model outputs driven by 3-hourly JRA55  
336 reanalysis atmospheric forcing. The snow assimilation processes are illustrated in Fig. 1, with  
337 a more detailed description in Table 1. Since data assimilation is conducted by considering the  
338 error of SWE in both the model and the observation, it is important to accurately understand  
339 the observation and model errors to improve the performance of data assimilation. The  
340 experiment calculates the model error from the 24 ensemble member spreads generated by  
341 perturbing atmospheric forcings such as longwave radiation, shortwave radiation, and  
342 precipitation in JULES LSM, as provided in section 2.3. The observation error is  
343 conservatively prescribed as 10% of AMSR2 SWE for each grid compared to the previous  
344 study(Lee et al., 2015), because it usually increases during the snow accumulation period with  
345 the developing deep snowpack(Foster et al., 2005; Cho et al., 2017). Here, the bias-corrected  
346 AMSR2 satellite data as described in section 3.1 is used as the observation data, and the updated  
347 analysis state( $X^a$ ) through data assimilation becomes a new initial state for the next integration  
348 in JULES LSM(Fig. 1). In addition, the analysis state of this method is calculated based on the  
349 IMS snow cover fraction as a reference in the following way(Fig. 1); where the SCF of IMS is  
350 zero, the snow amount analysis is set to zero, and in other cases, it is derived from data  
351 assimilation. The reason for this is due to the importance of the presence or absence of snow  
352 in the climate system, as well as the high reliability of the IMS data. A background experiment  
353 of JULES LSM without satellite data assimilation as a baseline(referred to hereafter as  
354 “Openloop”) is also achieved by employing the same ensemble perturbations, thereby  
355 measuring the skill improvement from the snow analysis state through the assimilation of  
356 satellite-derived SWE and IMS SCF from satellite and surface observations(referred to  
357 hereafter as “DA”). All experiments are conducted in April from 2013 to 2020, which is one



358 of the months with low snow performance in the LSM when the snow begins to melt in the  
359 Northern Hemisphere(e.g., Toure et al., 2018; You et al., 2020).





## 360 4. Results

### 361 4.1. Skill Verification

362 Figure 2 displays the climatological-mean SCF from the IMS multi-satellite data (Brown et  
363 al., 2014) and the differences from AMSR2, Openloop, JRA55, and DA for April 2013-2020.  
364 April is a season when the accumulated snow during the cold season begins to melt. This study  
365 defines the transitional region with a climatological-mean SWE of less than 16 mm as in  
366 previous studies (e.g., Gan et al., 2021), the boundary of these transition regions is represented  
367 by the black lines in Fig. 2. The transitional regions exhibit large variability in space and time,  
368 and they are mainly located at mid-latitudes. The SCF climatology patterns show negligible  
369 differences in high latitudes of heavy snow accumulation but noticeable differences in the  
370 transitional mid-latitude regions of less snow. SCF from JRA55 tends to be underestimated  
371 compared to IMS, whereas AMSR2 and Openloop tend to overestimate. There is a clear  
372 difference in SCF between AMSR2 and IMS satellite data. **This study gives more credibility**  
373 **to IMS than AMSR2, as the former is based on multiple satellite data sources.** As we used the  
374 IMS SCF to define the snow region to be assimilated by AMSR2 SWE, it is natural that DA  
375 shows better consistency with IMS and reduces overestimation biases in Openloop.  
376 Quantitatively, the root mean square differences (**accuracy**) for AMSR2, Openloop, JRA55, and  
377 DA with (from) IMS are 0.23(0.91), 0.18(0.91), 0.13(0.93), and 0.13(0.97), respectively,  
378 **showing the best consistency in DA.**

379 The SWE climatology from AMSR2, Openloop, JRA55, and DA is also compared with  
380 CMC as a reference in Fig. 3. The SWE derived from AMSR2 shows a significant  
381 underestimation compared to CMC, particularly in the regions with heavy snow accumulation  
382 at high latitudes. This is presumed to be due to limitations in satellite sensors detecting the  
383 depth of snow (Gan et al., 2021). On the other hand, the climatological SWEs from Openloop  
384 and DA exhibit higher correspondence to CMC, even higher than JRA55. **Specifically, DA**



385 demonstrates a higher agreement with CMC. Quantitatively, the pattern correlation  
386 coefficients (root mean square differences) for AMSR2, Openloop, JRA55, and DA with (from)  
387 CMC are 0.63(80.7 kg/m<sup>2</sup>), 0.80(50.1 kg/m<sup>2</sup>), 0.60(100.8 kg/m<sup>2</sup>), and 0.80(49.9 kg/m<sup>2</sup>),  
388 respectively. DA with snow data assimilation displays the highest correlation and the smallest  
389 root mean square difference among the datasets, indicating the benefit of assimilating the  
390 AMSR2 SWE despite the relatively lower performance of the satellite data itself.

391 Next, we compare the temporal variation of SWE as measured by the Spearman rank  
392 correlation coefficient with CMC, which is regarded as more appropriate than the Pearson  
393 correlation coefficient for describing nonlinear variables such as snow in both time and space.  
394 Figure 4 compares the distribution of correlation skills from AMSR2, Openloop, JRA55, and  
395 DA. Openloop has a high performance in regions with heavy snow accumulation but relatively  
396 low performance in transition regions with significant snow changes. In contrast, the results  
397 from the AMSR2 satellite data represent poor performance in high-latitude areas with heavy  
398 snow accumulation but high performance in transitional regions, consistent with the previous  
399 studies (Gan et al., 2021). DA shows high performance not only in high-latitude areas with  
400 heavy snow accumulation but also in transition regions. Even compared to JRA55 used as the  
401 atmospheric forcing, DA performs better in temporal variation. The quantitative results in the  
402 correlation in the Northern Hemisphere over 40°N (the transition region) are 0.41(0.54) for  
403 AMSR2, 0.61(0.48) for Openloop, 0.58(0.58) for JRA55, and 0.67(0.61) for DA, respectively.  
404 The findings indicate that satellite retrievals offer additional value in capturing temporal  
405 variations through data assimilation.

406 The performance improvement by DA is also evident in the zonally-averaged correlation  
407 coefficient shown in Fig. 5. The AMSR2 satellite data shows higher performance than  
408 Openloop in the transition region around latitude 45 °N–55 °N, although performance sharply  
409 decreases with increasing snow accumulation. Openloop indicates gradually increasing



410 performance as the latitude increases, with the highest performance at around 60°N. DA  
411 denotes superior performance across the Northern Hemisphere, especially in the mid-latitude  
412 transition region than AMSR2 or JRA55. An exception is for 35-40°N in the Tibetan Plateau,  
413 where JRA55 used in-situ observations. The results suggest that the developed snow data  
414 assimilation system represents well not only the transitional regions but also the satellite-  
415 limited regions with heavy snow.

416 Figure 6 presents the Spearman rank correlation depending on the SWE amount in the  
417 Northern Hemisphere. AMSR2 exhibits higher performance than Openloop for SWE up to 16  
418 mm. However, the performance of AMSR2 sharply declines beyond that threshold, and  
419 Openloop shows a better performance. Consistent with the results illustrated in Figs. 4 and 5,  
420 DA demonstrates superior performance compared to others. Note that DA performs  
421 significantly better in the transition region of less than 16 mm of SWE. Considering that the  
422 area below 16 mm of SWE accounts for approximately 53% of the entire area of the Northern  
423 Hemisphere(as shown in the pie chart in Fig. 6), the data assimilation impact is identifiable,  
424 and it can contribute substantially to the increase in the prediction skill through improving the  
425 simulation of the albedo changes and surface energy balance.

426 This study conducted a further sensitivity test to investigate the influence of incorporating  
427 IMS snow cover in snow assimilation. Figure 7 compares the correlation differences between  
428 Openloop and the data assimilation result employing both AMSR2 and IMS(DA), as well as  
429 the data assimilation result utilizing solely AMSR2 and excluding IMS(hereafter referred to as  
430 DA\_AMSR2). The results obtained from the snow assimilation show the improvements in the  
431 transitional regions where AMSR2 denotes a better agreement with the observations compared  
432 to Openloop. Notably, the skill is enhanced significantly in DA by incorporating the IMS SCF.  
433 There are exceptional areas where DA performs inferior to Openloop, which are associated  
434 with the differences in SCF between IMS and CMC. Moreover, the performance of SWE



435 improves even when only AMSR2 is used, but incorporating IMS leads to a substantial  
436 improvement in the transitional regions. This implies that IMS has a positive influence on the  
437 snow data assimilation.

438

439

#### 440 **4.2 Kalman gain analysis**

441 In order to better understand the skill enhancement through snow assimilation of satellite  
442 data, this section examines the Kalman gain, which represents the weights of the assimilated  
443 observations in the analysis update of LETKF. Figure 8 illustrates the spatial distribution of  
444 observation error, model background error, and the Kalman gain. A high value of the Kalman  
445 gain denotes that the assimilated result is closer to the AMSR2 observation than the model  
446 background. The Kalman gain is large when the model error becomes large, or the observation  
447 error is small. As this study specifies the observation error as a conservative 10% of SWE  
448 compared to the previous study(Lee et al., 2015), the observation error basically follows the  
449 distribution similar to the climatological-mean values. The background errors, originating from  
450 the 24 ensemble members, have higher values in high-latitude regions and mid-latitude regions.  
451 Data assimilation methods such as LETKF used in this study often face challenges in accurately  
452 representing background errors when the ensemble spread is insufficient. Generally, the  
453 magnitude of ensemble spread is frequently compared to the root mean square error(RMSE).  
454 The background error in this study demonstrates a sufficiently valid magnitude in comparison  
455 with the RMSE, as illustrated in SFig. 1, indicating that it is well estimated. In the spatial  
456 distribution of Kalman gain in Fig. 8c, significant performance improvement is observed in  
457 transition regions, where Kalman gains exhibit larger values. However, in high-latitude areas  
458 with substantial snow accumulation, there is a tendency for Kalman gain to have lower values.  
459 These findings agree well with the bar graph in Fig. 9, which illustrates the Kalman gain as a



460 function of SWE amount. In the region encompassing the transition region with SWE amounts  
461 below 20 mm, the Kalman gain displays the highest values, particularly exceeding 0.8. As the  
462 SWE amount increases, the Kalman gain decreases, with a significant decline observed when  
463 the SWE amount reaches 80-100 mm or higher. Furthermore, in the areas where DA denotes  
464 improved skill compared to Openloop, the Kalman gain shows values generally above 0.7. In  
465 contrast, relatively lower values below 0.5 are observed in the areas with decreased skill. This  
466 indicates that in the dominant areas of performance improvement, including the transition  
467 region, the background error is significantly larger than the observation error, emphasizing the  
468 substantial influence of observations in data assimilation. It is found that accurate remote  
469 sensing retrievals are well reflected in regions with high uncertainty in the LSM through the  
470 snow data assimilation system, leading to performance improvement.

471

472

### 473 **4.3 Validation of the SWE for the extreme event**

474 In April 2020, Siberia experienced a record-breaking heatwave with the highest observed  
475 average temperature. This section investigates the potential benefits of snow assimilation using  
476 satellite data for the case of the 2020 Siberian heatwave. Previous studies have identified the  
477 strong polar vortex accompanied by the AO amplification during winter as a major cause of  
478 the cold Eurasian(Overland and Wang, 2021). Additionally, it has been revealed that the  
479 occurrence of high temperatures in the Siberian region is found to be closely related to the  
480 development of large-scale atmospheric waves in the upper atmosphere of the Eurasian region,  
481 indicating a significant influence on the strengthened land-atmosphere interaction in recent  
482 years. As a result, remarkable snow melting occurred due to the high surface temperature over  
483 the Siberian region in April 2020, leading to extremely low values of SWE and SCF as depicted  
484 in SFig. 2. This is consistent with previous studies reporting a significant snow depletion in



485 2020 in the region(Gloege et al., 2022). Especially, as shown in Fig. 10, significant negative  
486 anomalies in SWE and SCF are predominant over the transition region. **With a substantial snow**  
487 **melting, it increases the sensible heat flux to the atmosphere, thereby strengthening the upper-**  
488 **level waves by enhanced atmosphere-land interaction, leading to further intensification of**  
489 **heatwaves.** This implies the importance of realistic snow initial states in the global coupled  
490 model forecasts. For the Siberian region with extreme high-temperature events marked by the  
491 red box in Fig. 10, DA shows a better agreement with the extremely dry snow conditions,  
492 especially in the transitional region, compared to the Openloop. These results are evident when  
493 considering the observation-to-model ratio in that region. The percentage of CMC(IMS) is  
494 83%(78%) for Openloop and 93%(89%) for DA, indicating that DA with snow data  
495 assimilation based on satellite data produces **more significant changes in snow** in comparison  
496 with Openloop. Similarly to the 2020 case, we obtained another significant case in 2014  
497 compared to Openloop, as shown in SFig. 3. Such extremely dry snow conditions can provide  
498 significant heatwave events in the following months.

499

500

501

502

503

504



## 505 **5. Conclusions**

506 The advanced snow data assimilation is developed in this study with the LETKF data  
507 assimilation method based on the JULES LSM. The system assimilates snow retrievals from  
508 AMSR2 and IMS remote sensing observations. This study showed that the satellite-derived  
509 snow data has limitations in penetrating deep snow, and exhibited much discrepancy from the  
510 snow obtained from the Openloop LSM simulations. The snow assimilation framework  
511 developed in this study proves the beneficial impacts of using satellite snow data, maintaining  
512 better analysis quality both in the regions with low satellite data quality and the high satellite  
513 data quality by dynamically balancing the errors from the satellite observations and the model  
514 background forecasts. It is found that the simulation from Openloop as a baseline shows  
515 superior performance in high-latitude regions with heavy snow accumulation but relatively  
516 inferior performance in transition regions with significant snow changes. Contrastingly, the  
517 results of the AMSR2 satellite data represent poor performance in high-latitude regions but  
518 exhibit good performance in transition regions. AMSR2 demonstrates higher performance than  
519 Openloop up to 16 mm of SWE, but beyond that threshold, the skill of AMSR2 sharply declines  
520 while Openloop shows better performance. DA with snow data assimilation consistently  
521 performs better in the climatological-mean pattern and temporal variation compared to other  
522 results. Notably, the snow assimilation system in this study reflects well the errors and  
523 advantages of land surface models and satellite-derived data, controlling not only the transition  
524 regions but also the satellite-limited regions with heavy snow.

525 The significant improvement of SWE data assimilation is primarily observed in the  
526 transition regions of less than 16 mm, which accounts for approximately 53% of the entire  
527 areas of the Northern Hemisphere. A sensitivity test also revealed that the use of IMS SCF led  
528 to a substantial improvement in the transitional regions, in addition to the use of AMSR2 SWE.  
529 The sources contributing to the skill improvement of SWE in the snow assimilation system can



530 be explained through Kalman gain analysis, measuring the relative importance of observations  
531 given the model background errors. Higher Kalman gains values above 0.7 were observed in  
532 the transition regions, whereas they decreased below 0.5 in the high latitudes with heavy snow  
533 accumulation. It found that in the dominant areas of performance improvement, including the  
534 transition region, the background error is significantly larger than the observation error,  
535 emphasizing the substantial influence of observations in the snow assimilation process.

536 In the case of the Siberian heatwave, remarkable snow melting occurred due to high surface  
537 temperature over the Siberian region in April 2020. It resulted in extremely low values of SWE  
538 and SCF, leading to a further intensification of the heatwave. The SWE anomalies from the  
539 snow data assimilation with the AMSR2 satellite showed significant changes in snow that  
540 seemed to better explain the heatwave episode than the Openloop.

541 The quality of the observation is crucial in the data assimilation system. Satellite-derived  
542 snow cover exhibits a significantly higher accuracy compared to other data sources, while SWE  
543 has restricted performance due to the limitations of penetration depth by satellite sensors and  
544 relies heavily on estimation algorithms. Due to these problems, most previous studies and  
545 operational centers primarily depend on satellite-derived snow cover for snow initialization.  
546 However, the findings from this study highlighted the beneficial impacts of using satellite-  
547 derived SWE, particularly in the rapidly changing transition areas, to find out which variable  
548 is more important in closing surface energy and water balance changed by snow. Nevertheless,  
549 areas of significance in large-scale circulation, such as the Tibetan region, which experiences  
550 significant uncertainty and degraded performance in satellite data, do not exhibit substantial  
551 data assimilation effects. As the performance of SWE derived from various satellites continues  
552 to advance, these issues will be discussed more.

553 Improved snow estimates from the snow assimilation system can enhance the initialization  
554 of climate models used in most of the seasonal forecast operation centers. As snow significantly





555 influences energy and water balance at the atmosphere-land boundary, this approach allows for  
556 a more accurate prediction of atmospheric conditions by realistically representing atmosphere-  
557 land interactions. Specifically, this applies to transitional regions where the reliability of snow  
558 estimation performance through model simulations is compromised. The long-term analysis of  
559 snow manifests a pronounced variability in the continental interior at the interannual timescales,  
560 potentially improving the prediction of extreme heatwave events by global couple models. This  
561 study used the gridded CMC data as a validation reference, which is based on in-situ  
562 observations. Despite much uncertainty and limitations of this dataset, we expect to obtain  
563 comparable conclusions to this study through comparisons with other independent,  
564 observation-based datasets.

565

566



567 **Key words**

568 Snow data assimilation, AMSR2, LETKF, snow water equivalent, JULES LSM

569

570 ***Data availability.***

571 The AMSR2 SWE and IMS SC were obtained from  
572 [https://n5eil01u.ecs.nsidc.org/AMSA/AU\\_DySno.001/](https://n5eil01u.ecs.nsidc.org/AMSA/AU_DySno.001/) and  
573 <https://noadata.apps.nsidc.org/NOAA/G02156/>, respectively. The CMC SWE was collected  
574 from [https://daacdata.apps.nsidc.org/pub/DATASETS/nsidc0447\\_CMC\\_snow\\_depth\\_v01/](https://daacdata.apps.nsidc.org/pub/DATASETS/nsidc0447_CMC_snow_depth_v01/).

575 The snow-assimilated results and land surface variables from the LSM offline simulation may  
576 be requested from the authors.

577

578 ***Author contributions.***

579 LJL conceived the project, designed the study, developed the snow assimilation system, wrote  
580 the paper, and made the figures. LMI provided advice on the methods, project design, and  
581 review and editing of the manuscript. TSL helped with the experiment with the land surface  
582 model. SEK helped with the data assimilation method based on LETKF. LYK provided advice  
583 on snow satellite data and the sensitivity methods. All authors contributed to the writing of the  
584 paper by providing comments and feedback.

585

586 ***Competing interests.***

587 The contact author has declared that none of the authors has any competing interests.

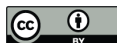

## 588 Reference

- 589 Allen, R.J., Zender, C.S.: Forcing of the Arctic Oscillation by Eurasian snow cover. *J. Clim.* 24 (24),  
590 6528–6539, 2011.
- 591 Best, M.J., Pryor, M., Clark, D.B., Rooney, G.G., Essery, R., Ménard, C.B., Edwards, J.M., Hendry, M.A.,  
592 Porson, A., Gedney, N., Mercado, L.M., Sitch, S., Blyth, E., Boucher, O., Cox, P.M.,  
593 Grimmond, C.S.B., Harding, R.J.: The Joint UK Land Environment Simulator (JULES), model  
594 description–Part 1: energy and water fluxes. *Geosci. Model Dev.* 4, 677–699, 2011.
- 595 Boone, A., Habets, F., Noilhan, J., Clark, D., Dirmeyer, P., Fox, S., Gusev, Y., Haddeland, I., Koster, R.,  
596 Lohmann, D., Mahanama, S., Mitchell, K., Nasonova, O., Niu, G.Y., Pitman, A., Polcher, J.,  
597 Shmakin, A., Tanaka, K., van den Hurk, B., Ver’ rant, S., Verseghy, D., Viterbo, P., Yang, Z.L.: The  
598 Rhone-Aggregation land surface scheme intercomparison project: an overview. *J. Clim.* 17,  
599 187–208, 2004.
- 600 Brasnett, B.: A global analysis of snow depth for numerical weather prediction. *J. Appl. Meteorol.* 38  
601 (6), 726–740, 1999.
- 602 Brown, L.C., Howell, S.E., Mortin, J., Derksen, C.: Evaluation of the Interactive Multisensor Snow and  
603 Ice Mapping System (IMS) for monitoring sea ice phenology. *Remote Sens. Environ.* 147,  
604 65–78. doi: 10.1016/j.rse.2014.02.012, 2014.
- 605 Brown, R.D., Brasnett, B.: Canadian Meteorological Centre (CMC) Daily Snow Depth Analysis Data.  
606 NASA National Snow and Ice Data Center Distributed Active Archive Center, Boulder,  
607 Colorado, USA. <https://doi.org/10.5067/W9FOYWH0EQZ3>, 2010.
- 608 Brown, R.D., Brasnett, B., Robinson, D.: Gridded North American monthly snow depth and snow  
609 water equivalent for GCM evaluation. *Atmos.–Ocean*, 41, 1–14, 2003.
- 610 Broxton, P.D., Zeng, X., Dawson, N.: The impact of a low bias in snow water equivalent initialization  
611 on CFS seasonal forecasts. *J. Clim.* 30 (21), 8657–8671. <https://doi.org/10.1175/JCLI-D-17-0072.1>, 2017.
- 613 Brubaker, K., Pinker, R., Deviatova, E.: Evaluation and comparison of MODIS and IMS snow-cover  
614 estimates for the continental United States using station data. *J. Hydrometeorol.* 6, 1002–  
615 1017, 2009.
- 616 Chen, M., Wang, W., Kumar, A.: Prediction of monthly-mean temperature: The roles of atmospheric  
617 and land initial conditions and sea surface temperature *J. Clim.* 23(3), 717–725, 2010.
- 618 Cho, E., Tuttle, S.E., Jacobs, J.M.: Evaluating consistency of snow water equivalent retrievals from  
619 passive microwave sensors over the north central US: SSM/I vs. SSMIS and AMSR-E vs.  
620 AMSR2. *Remote Sens.* 9(5), 465, 2017.
- 621 Cohen, J., Barlow, M., Kushner, P. J., Saito, K.: Stratosphere–troposphere coupling and links with  
622 eurasian land surface variability. *J. Clim.* 20(21), 5335–5343.  
623 <https://doi.org/10.1175/2007jcli1725.1>, 2007.
- 624 Dawson, N., Broxton, P., Zeng, X.: Evaluation of remotely sensed snow water equivalent and snow  
625 cover extent over the contiguous United States. *J. Hydrometeorol.* 19 (11), 1777–1791.  
626 <https://doi.org/10.1175/JHM-D-18-0007.1>, 2018.

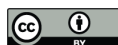

- 627 De Lannoy, G.J.M., Reichle, R.H., Houser, P.R., Arsenault, K.R., Verhoest, N.E.C., Pauwels, V.R.N.: Satellite-  
628 scale snow water equivalent assimilation into a high-resolution land surface model. *J.*  
629 *Hydrometeorol.* 11 (2), 352–369. <https://doi.org/10.1175/2009JHM1192.1>, 2010.
- 630 De Rosnay, P., Balsamo, G., Albergel, C., Muñoz-Sabater, J., Isaksen, L. Initialisation of land surface  
631 variables for numerical weather prediction. *Surv. Geophys.* 35, 607–621, 2014.
- 632 Dee, D., Uppala, S., Simmons, A., Berrisford, P., Poli, P., Kobayashi, S., Andrae, U., Balsameda, M.,  
633 Balsamo, G., Bauer, P., Bechtold, P., Beljaars, A.C.M., van de Berg, L., Bidlot, J., Bormann, N.,  
634 Delsol, C., Dragani, R., Fuentes, M., Geer, A.J., Haimberger, L., Healy, S.B., Hersbach, H., Hólm,  
635 E.V., Isaksen, L., Kållberg, P., Köhler, M., Matricardi, M., McNally, A.P., Monge-Sanz, B.M.,  
636 Morcrette, J.-J., Park, B.-K., Peubey, C., de Rosnay, P., Tavolato, C., Thépaut, J.-N., Vitart, F.: The  
637 ERA-Interim reanalysis: Configuration and performance of the data assimilation system. *Q.*  
638 *J. R. Meteorol. Soc.* 137, 553–597, 2011.
- 639 Dirmeyer, P. A., Gao, X., Zhao, M., Guo, Z., Oki, T., Hanasaki, N.: The Second Global Soil Wetness  
640 Project (GSWP-2): Multi-model analysis and implications for our perception of the land  
641 surface. *Bull. Amer. Meteor. Soc.* 87, 1381–1397, 2006.
- 642 Dutra, E., Schär, C., Viterbo, P., Miranda, P. M.: Land-atmosphere coupling associated with snow  
643 cover. *Geophys. Res. Lett.* 38 (15), 2011.
- 644 Dziubanski, D.J., Franz, K.J.: Assimilation of AMSR-E snow water equivalent data in a spatially-lumped  
645 snow model. *J. Hydrol.* 540, 26–39. <https://doi.org/10.1016/j.jhydrol.2016.05.046>, 2016.
- 646 Essery, R.L.H., Rutter, N., Pomeroy, J., Baxter, R., Stahli, M., Gustafsson, D., Barr, A., Bartlett, P., Elder,  
647 K.: SNOWMIP2: an evaluation of forest snow process simulations. *Bull. Amer. Meteor. Soc.*  
648 90, 1120–1135, 2009.
- 649 Foster, J.L., Sun, C., Walker, J.P., Kelly, R., Chang, A., Dong, J., Powell, H.: Quantifying the uncertainty  
650 in passive microwave snow water equivalent observations. *Remote Sens. Environ.* 94, 187–  
651 203, 2005.
- 652 Gan, Y., Zhang, Y., Kongoli, C., Grassotti, C., Liu, Y., Lee, Y. K., Seo, D. J.: Evaluation and blending of  
653 ATMS and AMSR2 snow water equivalent retrievals over the conterminous United  
654 States. *Remote Sens. Environ.* 254, 112280, 2021.
- 655 Gloege, L., Kornhuber, K., Skulovich, O., Pal, I., Zhou, S., Ciais, P., Gentine, P.: Land-Atmosphere Cascade  
656 Fueled the 2020 Siberian Heatwave. *AGU Advances*, 3 (6), e2021AV000619, 2022.
- 657 Hamill, T.M., Whitaker, J.S., Snyder, C.: Distance-dependent filtering of background error covariance  
658 estimates in an ensemble Kalman filter. *Mon. Weather Rev.* 129, 2776–2790, 2001.
- 659 Helfrich, S.R., McNamara, D., Ramsay, B.H., Baldwin, T., Kasheta, T.: Enhancements to, and forthcoming  
660 developments in the interactive multisensor snow and ice mapping system (IMS). *Hydrol.*  
661 *Process.* 21 (12), 1576–1586. <https://doi.org/10.1002/hyp.6720>, 2007.
- 662 Helmert, J., Şensoy Şorman, A., Montero, R.A., De Michele, C., De Rosnay, P., Dumont, M., Finger, D.,  
663 Lange, M., Picard, G., Potopová, V., et al.: Review of Snow Data Assimilation Methods for  
664 Hydrological, Land Surface, Meteorological and Climate Models: Results from a COST  
665 HarmoSnow Survey. *Geoscience*, 8 (12), 489, 2018.



- 666 Houtekamer, P.L., Mitchell, H.L.: A sequential ensemble Kalman filter for atmospheric data  
667 assimilation. *Mon. Weather Rev.* 129, 123–137, 2001.
- 668 Hunt, B.R., Kostelich, E.J., Szunyogh, I.: Efficient data assimilation for spatiotemporal chaos: a local  
669 ensemble transform Kalman filter. *Phys. D Nonlinear Phenom.* 230, 112–126, 2007.
- 670 Imaoka, K., Kachi, M., Kasahara, M., Ito, N., Nakagawa, K., Oki, T.: Instrument performance and  
671 calibration of AMSR-E and AMSR2. *Int. Arch. Photogramm. Remote. Sens. Spat. Inf. Sci.* 38  
672 (8), 13–16, 2010.
- 673 Jeong, J.H., Linderholm, H.W., Woo, S.H., Folland, C., Kim, B.M., Kim, S.J., Chen, D.: Impacts of snow  
674 initialization on subseasonal forecasts of surface air temperature for the cold season. *J.*  
675 *Clim.* 26 (6), 1956–1972, 2013.
- 676 Kobayashi, S., Ota, Y., Harada, Y., Ebata, A., Moriya, M., Onoda, H., Onogi, K., Kamahori, H., Kobayashi,  
677 C., Endo, H.: The JRA-55 reanalysis: general specifications and basic characteristics. *J.*  
678 *Meteorol. Soc. Jpn. Ser. II* 93, 5–48, 2015.
- 679 Koster, R.D., Dirmeyer, P.A., Guo, Z., Bonan, G., Chan, E., Cox, P., Gordon, C.T., Kanae, S., Kowalczyk,  
680 E., Lawrence, D., Liu, P., Lu, C.H., Malyshev, S., McAvaney, B., Mitchell, K., Mocko, D., Oki,  
681 T., Oleson, K., Pitman, A., Sud, Y.C., Taylor, C.M., Verseghy, D., Vasic, R., Xue, Y., Yamada,  
682 T., GLACE Team: Regions of strong coupling between soil moisture and  
683 precipitation. *Science*, 305 (5687), 1138–  
684 1140, <https://doi.org/10.1126/science.1100217>, 2004.
- 685 Koster, R.D., Mahanama, S., Yamada, T., Balsamo, G., Berg, A., Boisserie, M., Dirmeyer, P., Doblas-Reyes,  
686 F., Drewitt, G., Gordon, C.: The second phase of the global land–atmosphere coupling  
687 experiment: soil moisture contributions to subseasonal forecast skill. *J. Hydrometeorol.* 12,  
688 805–822, 2011.
- 689 Kumar, S.V., Jasinski, M., Mocko, D.M., Rodell, M., Borak, J., Li, B., Beaudoin, H.K., Peters-Lidard, C.D.:  
690 NCA-LDAS land analysis: development and performance of a multisensor, multivariate land  
691 data assimilation system for the national climate assessment. *J. Hydrometeorol.* 20 (8), 1571–  
692 1593. <https://doi.org/10.1175/JHM-D-17-0125.1>, 2019.
- 693 Kwon, Y., Yang, Z.-L., Hoar, T.J., Toure, A.M.: Improving the radiance assimilation performance in  
694 estimating snow water storage across snow and land-cover types in North America. *J.*  
695 *Hydrometeorol.* 18 (3), 651–668. <https://doi.org/10.1175/JHM-D-16-0102.1>, 2017.
- 696 Li, F., Orsolini, Y.J., Keenlyside, N., Shen, M.L., Counillon, F., Wang, Y.G.: Impact of snow initialization  
697 in subseasonal-to-seasonal winter forecasts with the Norwegian Climate Prediction  
698 Model. *J. Geophys. Res. Atmos.* 124 (17–18), 10033–10048, 2019.
- 699 Li, F., Wang, H.: Autumn Eurasian snow depth, autumn Arctic sea ice cover and East Asian winter  
700 monsoon. *Int. J. Climatol.* 34(13), 3616–3625, 2014.
- 701 Liu, Y., Peters-Lidard, C.D., Kumar, S.V., Arsenaault, K.R., Mocko, D.M.: Blending satellite-based snow  
702 depth products with in situ observations for streamflow predictions in the upper Colorado  
703 River basin. *Water Resour. Res.* 51 (2), 1182–1202. <https://doi.org/10.1002/2014WR016606>,  
704 2015.



- 705 Lee, Y.K., Kongoli, C., Key, J.: An in-depth evaluation of heritage algorithms for snow cover and snow  
706 depth using AMSR-E and AMSR2 measurements. *J. Atmos. Ocean. Technol.* 32(12), 2319-  
707 2336, 2015.
- 708 Meng, J., Yang, R., Wei, H., Ek, M., Gayno, G., Xie, P., Mitchell, K.: The land surface analysis in the  
709 NCEP climate forecast system reanalysis. *J. Hydrometeorol.* doi:10.1175/JHM-D-11-090.1,  
710 2012.
- 711 Meyal, A.Y., Versteeg, R., Alper, E., Johnson, D., Rodzianko, A., Franklin, M., Wainwright, H.: Automated  
712 cloud based long short-term memory neural network based SWE prediction. *Front. Water*, 2,  
713 574917, 2020.
- 714 Miyoshi, T., Yamane, S.: Local ensemble transform Kalman filtering with an AGCM at a T159/L48  
715 resolution. *Mon. Weather Rev.* 135, 3841–3861, 2007.
- 716 Orsolini, Y.J., Senan, R., Balsamo, G., Doblas-Reyes, F.J., Vitart, F., Weisheimer, A., Carrasco, A., Benestad,  
717 R.E.: Impact of snow initialization on sub-seasonal forecasts. *Clim. Dyn.* 41, 1969–1982, 2013.
- 718 Overland, J. E., Wang, M.: The 2020 Siberian heat wave. *Int. J. Climatol.* 41, E2341–E2346, 2021.
- 719 Pullen, S., Jones, C., Rooney, G.: Using satellite-derived snow cover data to implement a snow analysis  
720 in the met office NWP model. *J. Appl. Meteorol.* 50, 958–973. doi:10.1175/2010JAMC2527.1,  
721 2011.
- 722 Pulliainen, J., Luojus, K., Derksen, C., Mudryk, L., Lemmetyinen, J., Salminen, M., Ikonen, J., Takala, M.,  
723 Cohen, J., Smolander, T., Norberg, J.: Patterns and trends of Northern Hemisphere snow mass  
724 from 1980 to 2018. *Nature*, 581 (7808), 294–298. [https://doi.org/10.1038/s41586-020-2258-](https://doi.org/10.1038/s41586-020-2258-0)  
725 0, 2020.
- 726 Ramsay, B.H.: The interactive multisensor snow and ice mapping system. *Hydrol. Process.* 12 (10–11),  
727 1537–1546, 1998.
- 728 Reichle, R.H.: Data assimilation methods in the Earth sciences. *Adv. Water Resour.* 31, 1411–1418,  
729 2008.
- 730 Reichle, R.H., Draper, C.S., Liu, Q., Girotto, M., Mahanama, S.P., Koster, R.D., De Lannoy, G.J.:  
731 Assessment of MERRA-2 land surface hydrology estimates. *J. Clim.* 30 (8), 2937–2960, 2017.
- 732 Reichle, R.H., Koster, R.D.: Bias reduction in short records of satellite soil moisture. *Geophys. Res. Lett.*  
733 31, 2004.
- 734 Reichle, R.H., Koster, D., De Lannoy, G.J.M., Forman, B.A., Liu, Q., Mahanama, S.P.P., Toure, A.M.:  
735 Assessment and Enhancement of MERRA Land Surface Hydrology Estimates. *J. Clim.* 24,  
736 6322–6338, 2011.
- 737 Seo, E., Lee, M.I., Reichle, R.H.: Assimilation of SMAP and ASCAT soil moisture retrievals into the  
738 JULES land surface model using the Local Ensemble Transform Kalman Filter. *Remote Sens.*  
739 *Environ.* 253, 112222, 2021.
- 740 Shlyayeva, A., Tolstykh, M., Mizyak, V., Rogutov, V.: Local ensemble transform Kalman filter data  
741 assimilation system for the global semi-Lagrangian atmospheric model. *Russ. J. Numer. Anal.*  
742 *Math. Model.* 28(4), 419–442, 2013.
- 743



- 744 Sturm, M., Taras, B., Liston, G.E., Derksen, C., Jonas, T., Lea, J.: Estimating snow water equivalent using  
745 snow depth data and climate classes. *J. Hydrometeor.* 11, 1380–1394, 2010.
- 746 Su, H., Yang, Z.-L., Dickinson, R.E., Wilson, C.R., Niu, G.-Y.: Multisensor snow data assimilation at the  
747 continental scale: The value of gravity recovery and climate experiment terrestrial water  
748 storage information. *J. Geophys. Res.*, 115, D10104, doi:10.1029/2009JD013035, 2010.
- 749 Thomas, J.A., Berg, A.A., Merryfield, W.J.: Influence of snow and soil moisture initialization on sub-  
750 seasonal predictability and forecast skill in boreal spring. *Clim. Dyn.* 47 (1), 49-65, 2016.
- 751 Toure, A.M., Luoju, K., Rodell, M., Beaudoin, H., Getirana, A.: Evaluation of simulated snow and  
752 snowmelt timing in the Community Land Model using satellite-based products and  
753 streamflow observations. *J. Adv. Model. Earth Syst.* 10(11), 2933-2951, 2018.
- 754 U.S. National Ice Center: IMS daily Northern Hemisphere snow and ice analysis at 1 km, 4 km, and  
755 24 km resolutions, version 3. Boulder, Colorado, USA. NSIDC: National Snow and Ice Data  
756 Center, accessed: 18 Aug 2022, <https://doi.org/10.7265/N52R3PMC>, 2008.
- 757 You, Y., Huang, C., Gu, J., Li, H., Hao, X., Hou, J.: Assessing snow simulation performance of typical  
758 combination schemes within Noah-MP in northern Xinjiang, China. *J. Hydrol.* 581, 124380,  
759 2020.
- 760



761 **Table 1.** Description of the land surface model, the data used, and assimilation experiment  
 762 designs.

|                              | INFORMATION                                    | REFERENCES                                                        |
|------------------------------|------------------------------------------------|-------------------------------------------------------------------|
| Land Surface Model           | JULES                                          | Best et al., (2011)                                               |
| Atmospheric Forcing          | 3-hourly JRA-55 reanalysis                     | Kobayashi et al., (2015)                                          |
| Snow Observation             | AMSR2 & IMS                                    | Imaoka et al., (2010)<br>Ramsay (1998)<br>Helfrich et al., (2007) |
| Data Assimilation scheme     | Local Ensemble Transform Kalman Filter (LETKF) | Hunt et al., (2007)<br>Miyoshi and Yamane, (2007)                 |
| Resolution (km)              | 0.5° × 0.5° (~ 50)                             |                                                                   |
|                              | 1-day DA cycle                                 |                                                                   |
| Localization patch size (km) | 3×3 (150), $\sigma=30$                         |                                                                   |
| Ensemble sizes               | 24                                             |                                                                   |
| Experiment period            | 2013-2020, APR                                 |                                                                   |

763

764





765

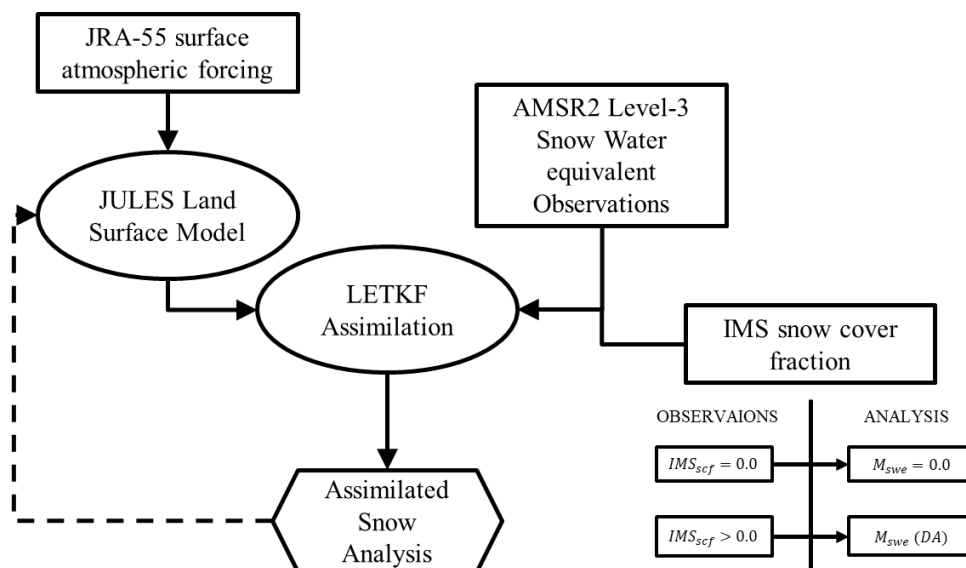

766

767 **Figure 1.** Schematic diagram of the snow assimilation system with satellite-derived

768 observations and the land surface model outputs.

769

770

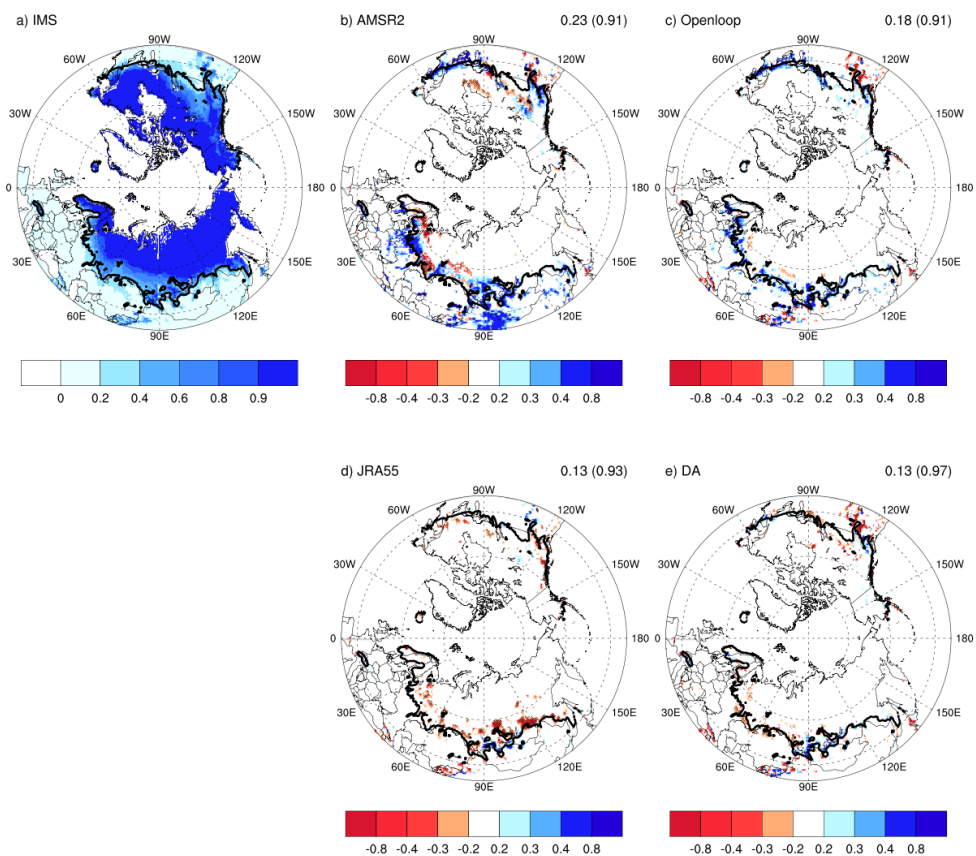

771

772 **Figure 2.** (a) Climatology of SCF from IMS used as reference and (b-e) the differences from  
773 IMS for AMSR2, base-line model simulation (Openloop), JRA55, and the data  
774 assimilation results (DA) for April during 2013-2020. The black line represents the  
775 boundary of the transition region, defined as the climatological-mean SWE of less than  
776 16mm. Each value on the top right is the root-mean-squared difference with IMS and  
777 the accuracy from IMS (parenthesis) for 15323 pixels over 40-60°N. The accuracy is  
778 defined in supplementary Table 1 as in previous study (Lee et al., 2015). **Negative**  
779 **values are indicated with a diagonal line.**

780

781

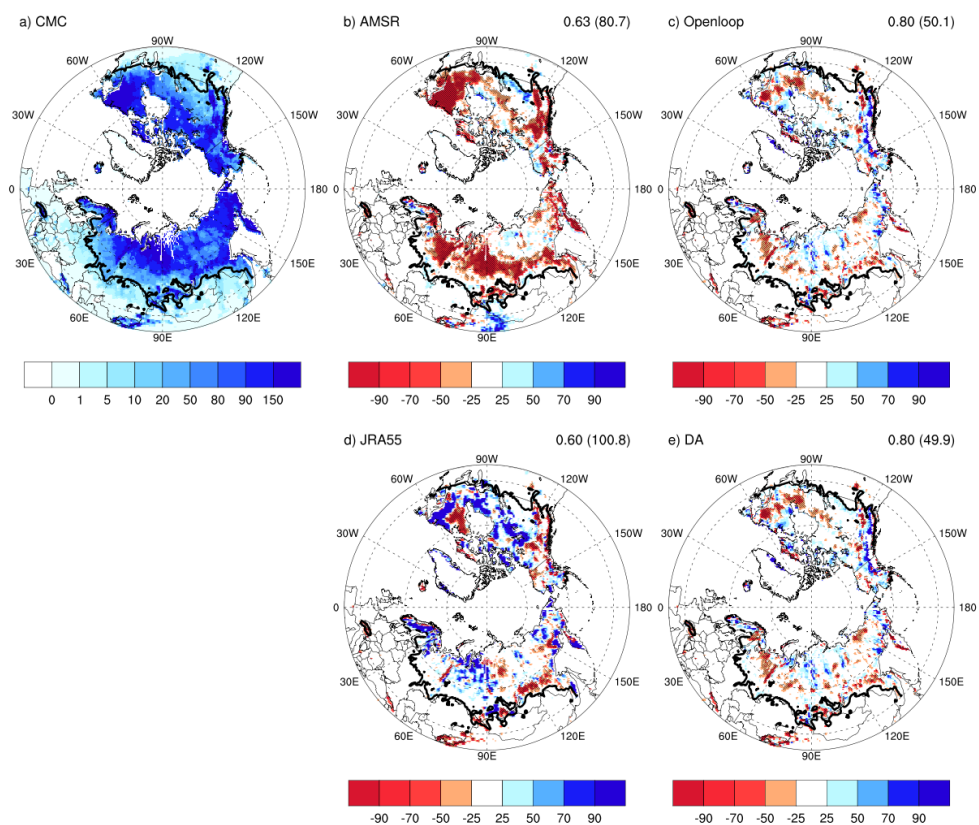

782

783 **Figure 3.** (a) Climatology of SWE from CMC used as reference and (b-e) the differences from  
784 CMC for AMSR2, base-line model simulation (Openloop), JRA55, and the data  
785 assimilation results (DA) for April during 2013-2020. The black line represents the  
786 boundary of the transition region, defined as the climatological-mean SWE of less than  
787 16mm. Each value on the top right is the pattern correlation with CMC for 26482 pixels  
788 over 40 °N and the root-mean-squared difference (unit: kg/m<sup>2</sup>) from IMS (parenthesis)  
789 for 15323 pixels over 40-60°N. Negative values are indicated with a diagonal line.

790

791

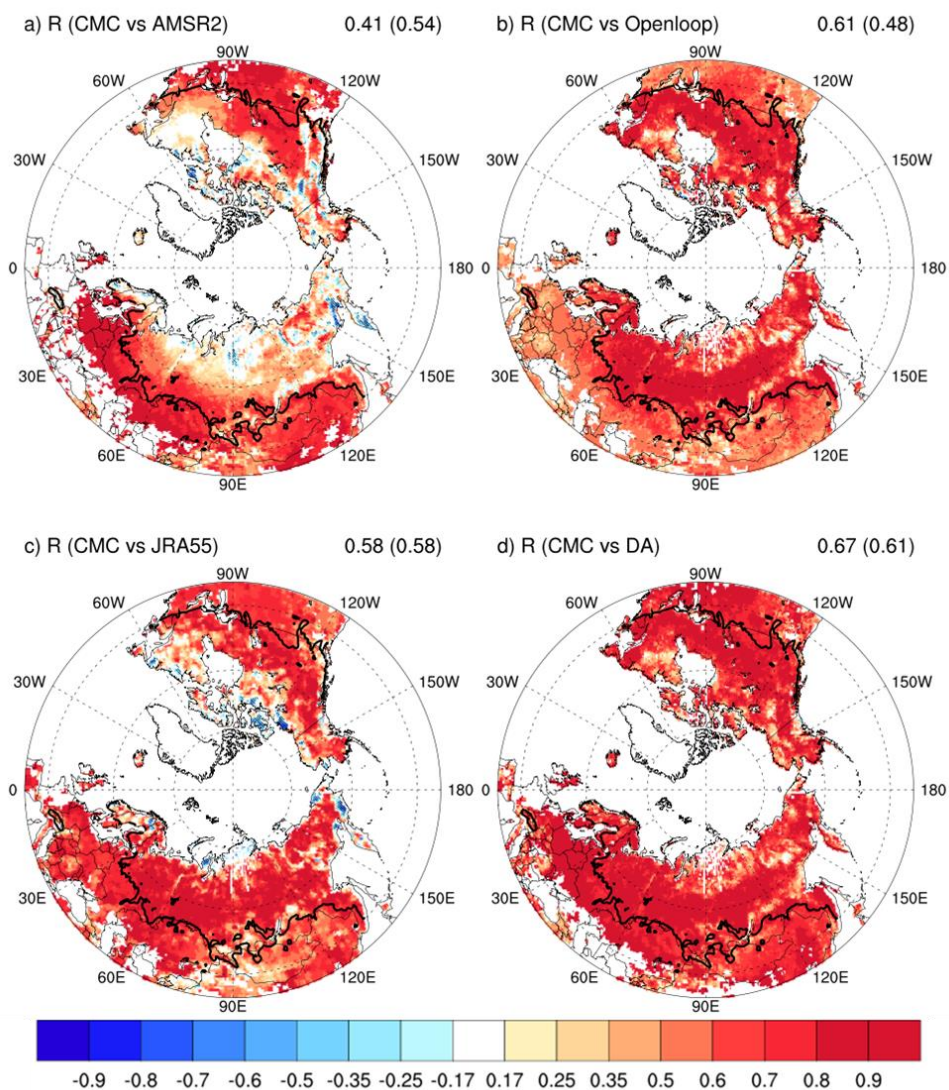

792

793 **Figure 4.** SWE skill measured as the Spearman rank correlation (R) with the CMC for AMSR2,  
794 base-line model simulation (Openloop), JRA55, and the data assimilation result (DA).  
795 The black line represents the boundary of the transition region, defined as the  
796 climatological-mean SWE of less than 16mm. Each value on the top is the **area-average**  
797 of North hemisphere for 26482 pixels over 40°N and for 8801 pixels over the transition  
798 region (parenthesis). Negative values are indicated with a diagonal line.

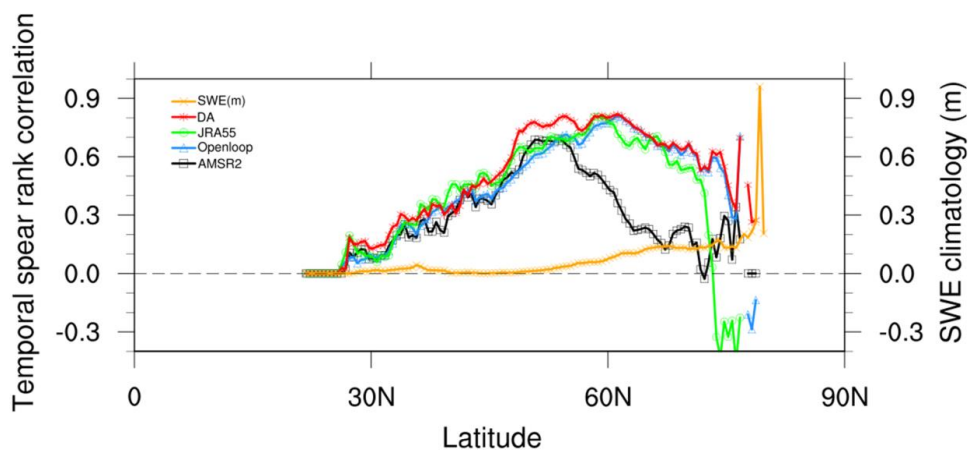

799

800 **Figure 5.** Zonally-averaged Spearman rank correlation (R) along the latitude for SWE. The  
801 yellow line indicates the climatology of SWE, and the black, blue, green, and red lines  
802 denote the values of AMSR2, base-line model simulation (Openloop), JRA55, data  
803 assimilation results (DA), respectively.

804

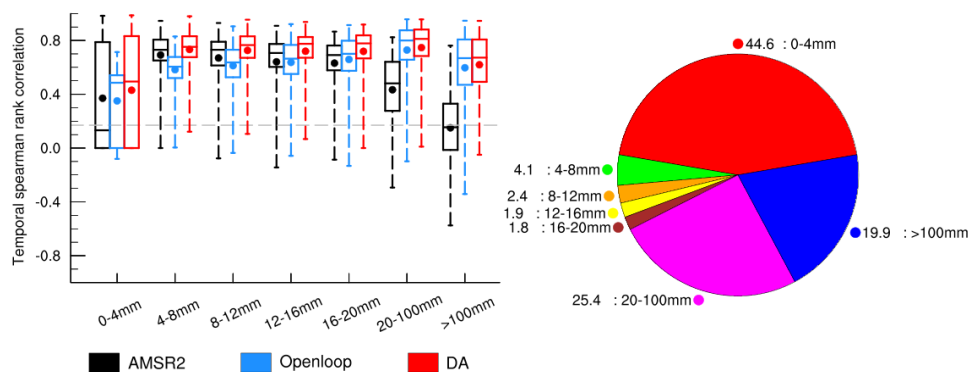

805

806 **Figure 6.** Box plots of the Spearman rank correlation (R) according to SWE. The pie chart  
807 shows the total area ratio (%) as a function of SWE amount. The black, blue, and red  
808 boxes denote the AMSR2, base-line model simulation (Openloop), and the data  
809 assimilation results (DA), respectively. The boxes indicate 25 and 75% percentiles, and  
810 the line and point in the boxes shows the median and the mean values. The upper and  
811 lower whiskers denote the 10 and 90% percentiles, respectively.

812



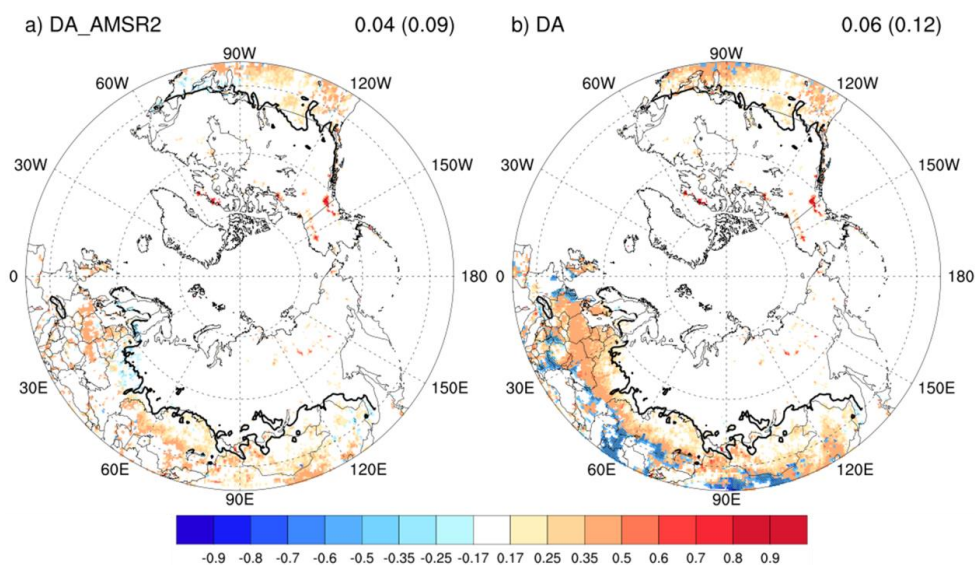

813

814

**Figure 7.** Difference in SWE skill, measured as the Spearman rank correlation coefficient ( $R$ ) with CMC, between the Openloop and the data assimilation result employing both AMSR2 and IMS (referred to as DA), as well as the data assimilation result utilizing solely AMSR2 and excluding IMS (referred to as DA\_AMSR2), for April during 2013-2020. The black line represents the boundary of the transition region, defined as the climatological-mean SWE of less than 16mm. Each value on the top right is the area-average over 40°N and the transition region (parenthesis). Negative values are indicated with a diagonal line.

822

823

824

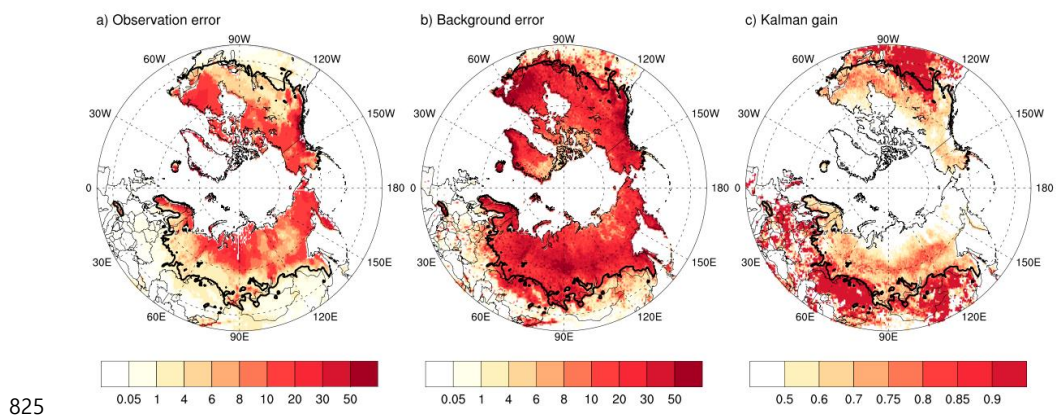

826 **Figure 8.** Spatial distribution of observation error, background error, and Kalman gain. The  
827 black line represents the boundary of the transition region, defined as the  
828 climatological-mean SWE of less than 16mm.

829



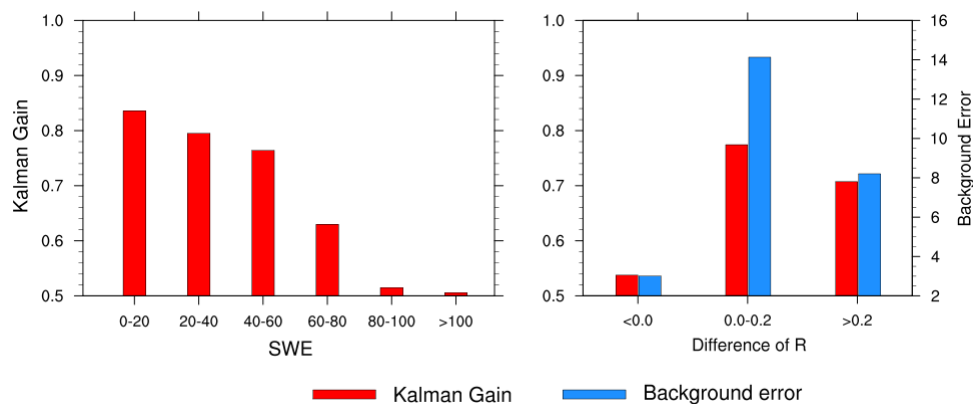

830

831 **Figure 9.** Bar chart of (left) the Kalman gain according to the SWE amount, and (right) the  
832 Kalman gain (red line) and background error (blue line) according to the **difference of**  
833 **the Spearman rank correlation (R) between Openloop and DA.**

834

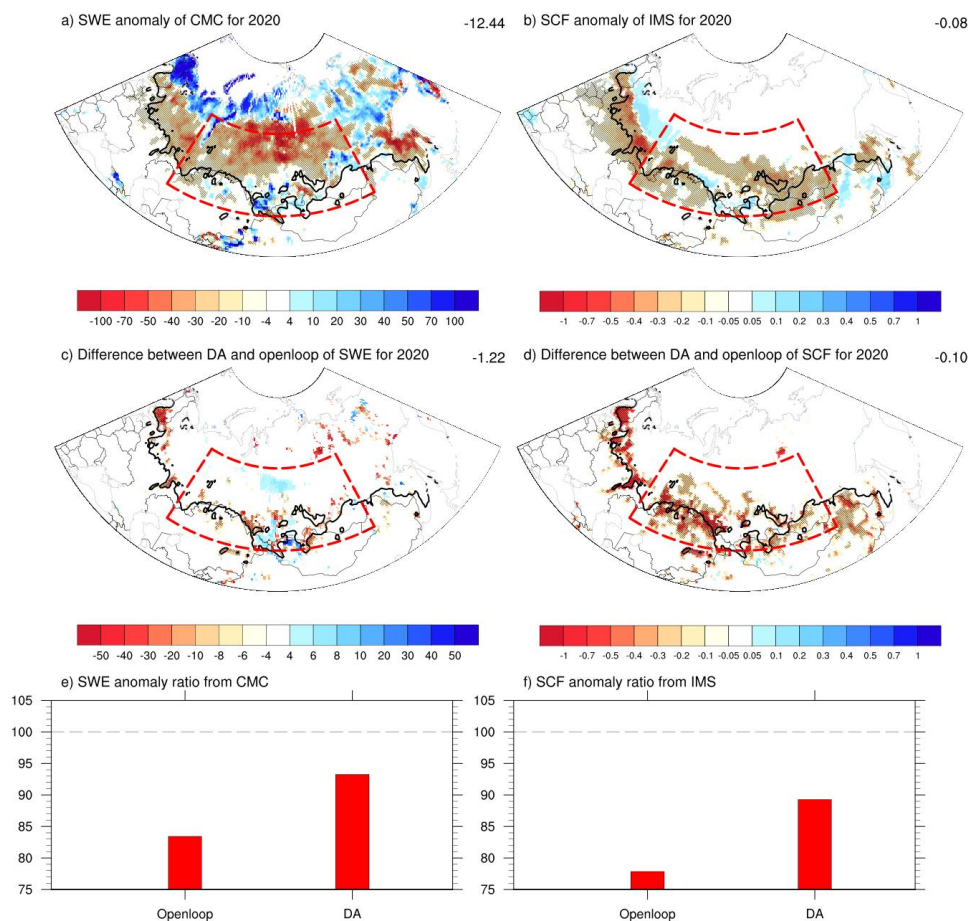

835

836 **Figure 10.** Anomalies of a) SWE from CMC and b) SCF from IMS as well as the difference  
837 (c, d) of variables between DA and openloop in April 2020. Bar chart (e, f) indicates  
838 the ratio of DA and openloop to verification data such as CMC and IMS in the red box  
839 (48–65°N and 55–120°E), which is the region associated with extreme high-temperature  
840 events, focused on this study. Negative values are indicated with a diagonal line.

841

842
